CORRECTION

## Correction: Ultrashort- $T_2^*$ mapping at 7 tesla using an optimized pointwise encoding time reduction with radial acquisition (PETRA) sequence at standard and extended echo times

Carly A. Lockard, Bruce M. Damon, Hacene Serrai

In the Ultrashort- $T_2^*$  mapping subsection of Materials and methods. There is an error in the second sentence of the first paragraph. The correct sentence is: The  $MnCl_2$  phantom contained ten 5 mL centrifuge tubes having 0.03–30.50 mM  $MnCl_2$  tetrahydrate, based on target ultrashort- $T_2^*$  values estimated using reported relaxivity relationships at 3T, and 30 mM NaCl in deionized water.

In [Table 2](#), the column Phantom  $MnCl_2$  solution concentration [mM] is incorrect. Please see the correct [Table 2](#) here.

In [Fig 3A](#) the values are incorrect. Please see the correct [Fig 3](#) here.

In [S2](#) and [S3 Tables](#), the column Phantom  $MnCl_2$  solution concentration [mM] are incorrect. Please see the correct [S2](#) and [S3 Table](#) here:

### Supporting information

**S2 Table. Results based on monoexponential fitting with a noise term for ultrashort- $T_2^*$  values, between-scan absolute and percent change, and ultrashort- $T_2^*$  fit  $R^2$  from two scans for the  $MnCl_2$  phantom.**

(DOCX)

**S3 Table. Results based on log-linear least squares fitting for ultrashort- $T_2^*$  values, between-scan absolute and percent change, and ultrashort- $T_2^*$  fit  $R^2$  from two scans for the  $MnCl_2$  phantom.**

(DOCX)

### Reference

1. Lockard CA, Damon BM, Serrai H. Ultrashort- $T_2^*$  mapping at 7 tesla using an optimized pointwise encoding time reduction with radial acquisition (PETRA) sequence at standard and extended echo times. PLoS One. 2025;20(4):e0310590. <https://doi.org/10.1371/journal.pone.0310590> PMID: [40245029](https://pubmed.ncbi.nlm.nih.gov/40245029/)

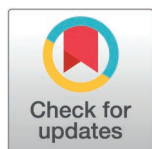

### OPEN ACCESS

**Citation:** Lockard CA, Damon BM, Serrai H (2026) Correction: Ultrashort- $T_2^*$  mapping at 7 tesla using an optimized pointwise encoding time reduction with radial acquisition (PETRA) sequence at standard and extended echo times. PLoS One 21(3): e0346005. <https://doi.org/10.1371/journal.pone.0346005>

**Published:** March 27, 2026

**Copyright:** © 2026 Lockard et al. This is an open access article distributed under the terms of the [Creative Commons Attribution License](https://creativecommons.org/licenses/by/4.0/), which permits unrestricted use, distribution, and reproduction in any medium, provided the original author and source are credited.

**Table 2.** Calculated ultrashort- $T_2^*$  values, between-scan absolute and percent change, and ultrashort- $T_2^*$  fit  $R^2$  from two scans for the  $MnCl_2$  phantom. The median and interquartile range values are calculated for the sample of all voxels within each ROI.

| Phantom $MnCl_2$ solution concentration [mM] | Scan 1 $T_2^*$ median (interquartile range) [msec] | Scan 2 $T_2^*$ median (interquartile range) [msec] | Between- scan $T_2^*$ absolute change [msec] | Between- scan $T_2^*$ percent change | Scan 1 mean $R^2$ | Scan 2 mean $R^2$ |
|----------------------------------------------|----------------------------------------------------|----------------------------------------------------|----------------------------------------------|--------------------------------------|-------------------|-------------------|
| 30.50                                        | 0.31 (0.03)                                        | 0.31 (0.03)                                        | 0.00                                         | 1%                                   | 0.96              | 0.96              |
| 15.25                                        | 0.47 (0.04)                                        | 0.49 (0.05)                                        | 0.02                                         | 5%                                   | 0.98              | 0.95              |
| 10.16                                        | 0.78 (0.10)                                        | 0.78 (0.06)                                        | 0.00                                         | 0%                                   | 0.86              | 0.88              |
| 6.09                                         | 1.07 (0.20)                                        | 1.14 (0.20)                                        | 0.07                                         | 7%                                   | 0.97              | 0.95              |
| 4.06                                         | 3.55 (3.90)                                        | 2.03 (0.61)                                        | 1.52                                         | 43%                                  | 0.50              | 0.84              |
| 3.04                                         | 2.91 (2.87)                                        | 2.45 (0.68)                                        | 0.47                                         | 16%                                  | 0.54              | 0.73              |
| 2.02                                         | 5.12 (2.17)                                        | 6.61 (1.80)                                        | 1.49                                         | 29%                                  | 0.34              | 0.24              |
| 1.26                                         | 4.73 (0.73)                                        | 6.08 (2.19)                                        | 1.34                                         | 28%                                  | 0.37              | 0.30              |
| 1.21                                         | 3.96 (2.23)                                        | 4.32 (1.87)                                        | 0.36                                         | 9%                                   | 0.56              | 0.64              |
| 0.03                                         | 12.34 (9.61)                                       | 9.89 (10.40)                                       | 2.44                                         | 20%                                  | 0.08              | 0.11              |

<https://doi.org/10.1371/journal.pone.0346005.t002>

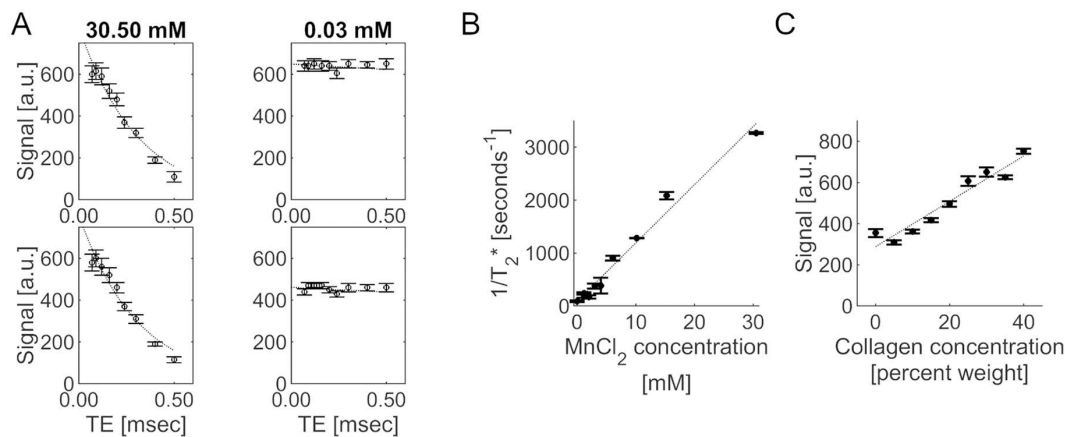

**Fig 3.  $MnCl_2$  phantom plots.** Plots showing examples of median measured (round markers) and fitted signal (dashed line) based on estimated ultrashort- $T_2^*$  signal versus TE for three  $MnCl_2$  phantom solutions from two (top and bottom plots for each region) scans (a), the relationship between mean  $1/T_2^*$  and  $MnCl_2$  concentration, averaged over two scans (b), the relationship between mean signal and collagen concentration at TE = 0.07 msec, averaged over three scans (c). Error bars represent the interquartile range within each subregion for signal versus TE plots and the standard deviation between scans for the  $1/T_2^*$  and signal versus concentration plots.

<https://doi.org/10.1371/journal.pone.0346005.g003>
